# Supplementary material for: Gold(i) complexes of water-soluble diphos-type ligands: Synthesis, anticancer activity, apoptosis and thioredoxin reductase inhibition
Source: Royal Society of Chemistry journal article supplement (doi:10.1039/c1dt10368g), 2011-01-01
Supplement: c1dt10368g.pdf [file c1dt10368g.pdf]

Electronic Supporting Information for

**Gold(I) complexes of water-soluble diphos-type ligands: Synthesis, anticancer activity, apoptosis and thioredoxin reductase inhibition.**

**Corinna Wetzel,<sup>[a]</sup> Peter C. Kunz,<sup>[a],\*</sup> Matthias U. Kassack,<sup>[b]</sup> Alexandra Hamacher,<sup>[b]</sup> Philip Böhler<sup>c</sup>, Wim Wätjen<sup>[c]</sup>, Ingo Ott<sup>[d]</sup>, Riccardo Rubbiani<sup>[d]</sup> and Bernhard Spingler<sup>[e]</sup>**

[a] C. Wetzel, PD Dr. P. C. Kunz

Institut für Anorganische Chemie und Strukturchemie, Lehrstuhl I: Bioanorganische Chemie und Katalyse, Heinrich-Heine-Universität Düsseldorf, Universitätsstr. 1, D-40225 Düsseldorf, Germany, Fax: (+) 49 211 8112287, E-mail: peter.kunz@uni-duesseldorf.de

[b] Prof. Dr. M. U. Kassack, Dr. A. Hamacher

Universitätsstr. 1, D-40225 Düsseldorf, Germany, Heinrich-Heine-University Düsseldorf, D-40225 Düsseldorf, Germany

[c] PD Dr. W. Wätjen, P. Böhler

Institut für Toxikologie, Heinrich-Heine-University Düsseldorf, Universitätsstr. 1, D-40225 Düsseldorf, Germany

[d] Prof. Dr. I. Ott, R. Rubbiani

Institut für Pharmazeutische Chemie, Technische Universität Braunschweig, Beethovenstr. 55, D-38106 Braunschweig, Germany

[e] PD Dr. B. Spingler

Anorganisch-Chemisches Institut, Universität Zürich-Irchel, Winterthurerstr. 190, CH-8057 Zürich, Switzerland

**1,2-Bis(chlorophenylphosphino)ethane:** A solution of dppe (10g, 0.025 mol) in thf was added drop-wise at 0 °C to a suspension of freshly cut lithium (1.74g, 0.25 mol) in thf. The colour of the suspension turned to orange and the suspension was stirred for 1 h at 0 °C and afterwards heated to reflux for 3 h. The suspension was stirred over night at ambient temperature, the remaining lithium was removed, the dark red solution cooled to 0 °C and PCl<sub>3</sub> added (5.5 mL, 0.063 mol). The suspension was stirred for 1 h at 0 °C and over night at ambient temperature. The precipitate was removed by filtration over a plug of Celite and the filtrate concentrated in vacuo. Toluene was added and the resulting suspension again filtered though a plug of Celite. All volatiles were removed in vacuo to give the product as a slightly yellow oil. Yield: 2.73 g. <sup>31</sup>P{<sup>1</sup>H}-NMR (CD<sub>2</sub>Cl<sub>2</sub>): δ = 94. <sup>1</sup>H-NMR (CDCl<sub>3</sub>): δ = 2.19 (t, J=8.06 Hz, 4H, (CH<sub>2</sub>)<sub>2</sub>), 7.40-7.66 (m, 10H, PhenylH's). MALDI (CH<sub>2</sub>Cl<sub>2</sub>): m/z = 278.8 [C<sub>14</sub>H<sub>16</sub>P<sub>2</sub>O<sub>2</sub>]<sup>+</sup>.

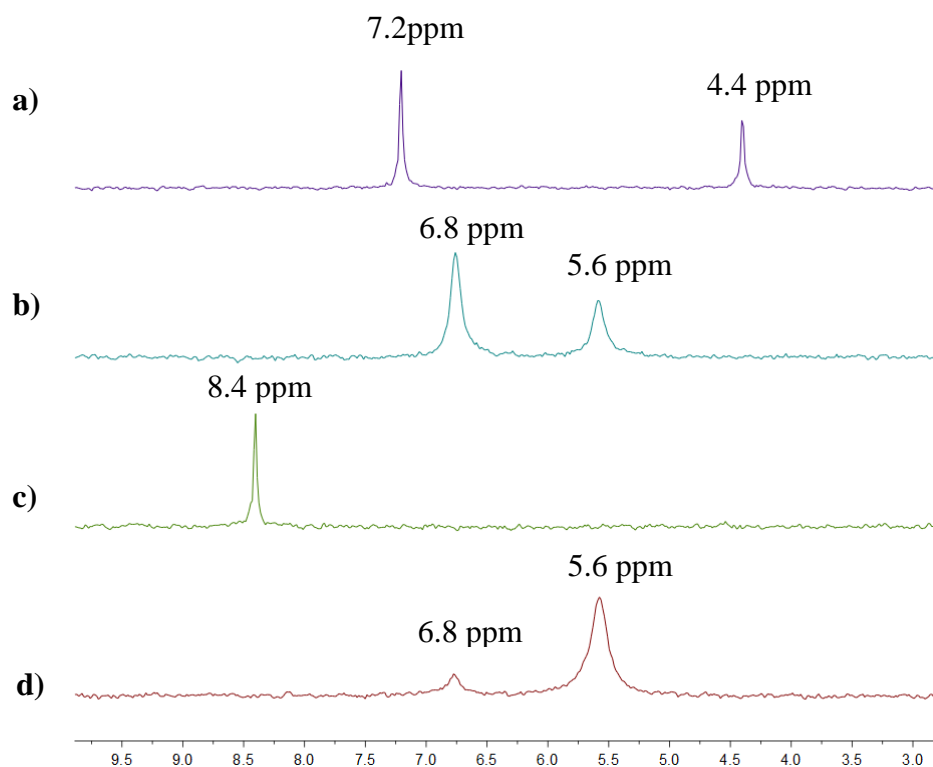

**Figure ESI1.** <sup>31</sup>P{<sup>1</sup>H}NMR-spectra of [(**3**)(AuCl)<sub>2</sub>]. a) Taken from the reaction mixture, b) after isolation of [(**3**)(AuCl)<sub>2</sub>], measured in dms<sub>o</sub>-d<sub>6</sub>, c) fraction of [(**3**)(AuCl)<sub>2</sub>] soluble in CHCl<sub>3</sub> measured in CDCl<sub>3</sub> and d) the residue not soluble in CHCl<sub>3</sub> measured in dms<sub>o</sub>-d<sub>6</sub>.

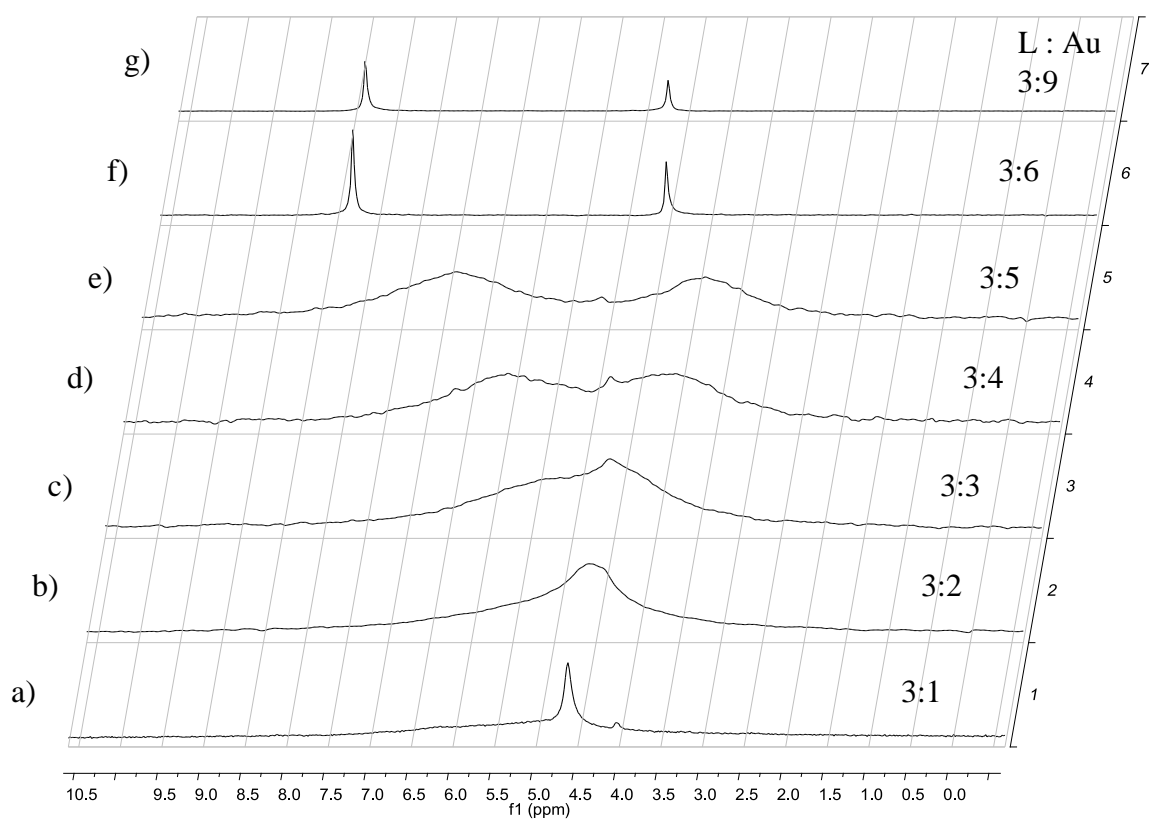

**Figure ESI2.**  $^{31}\text{P}\{^1\text{H}\}$  NMR-spectra of the NMR titration of **3** with  $[(\text{tth})\text{AuCl}]$  in  $\text{CHCl}_3$ .

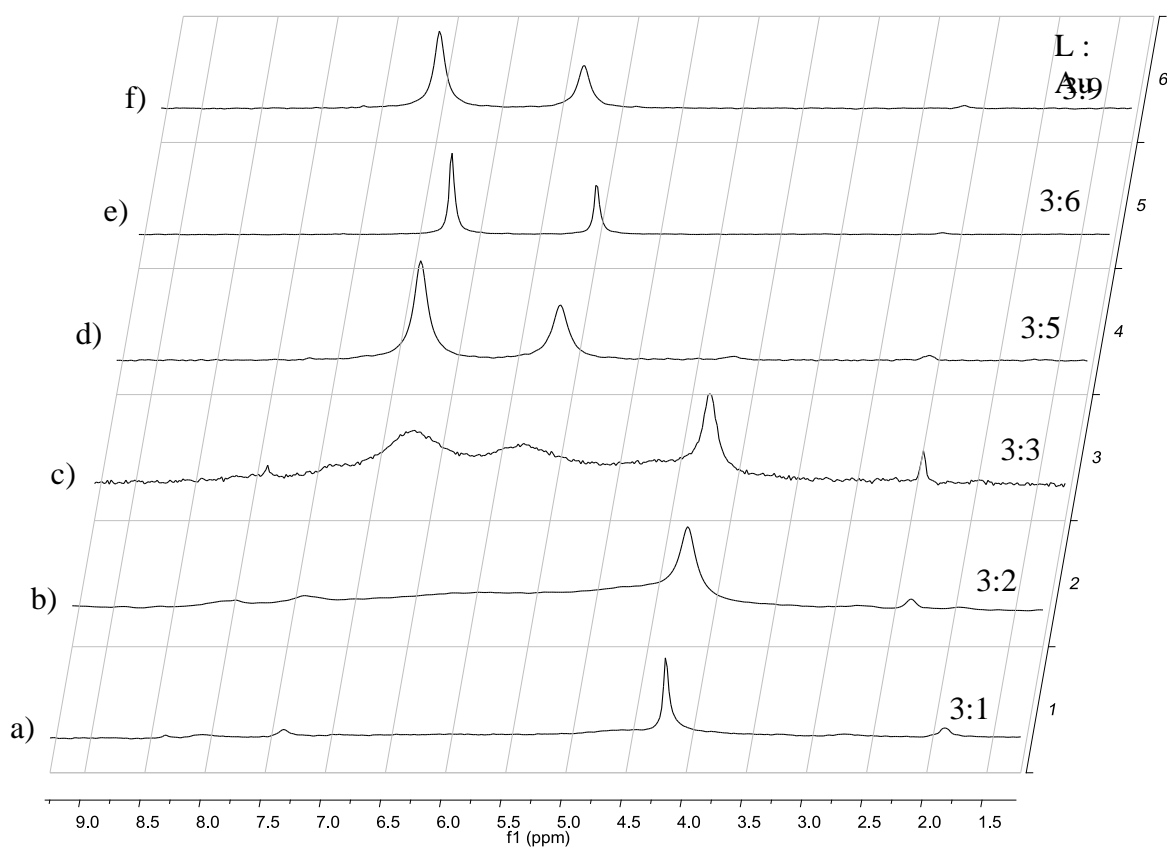

**Figure ESI3.**  $^{31}\text{P}\{^1\text{H}\}$  NMR-spectra of the NMR titration of **3** with  $[(\text{tth})\text{AuCl}]$  in  $\text{dmsO}-d_6$ .

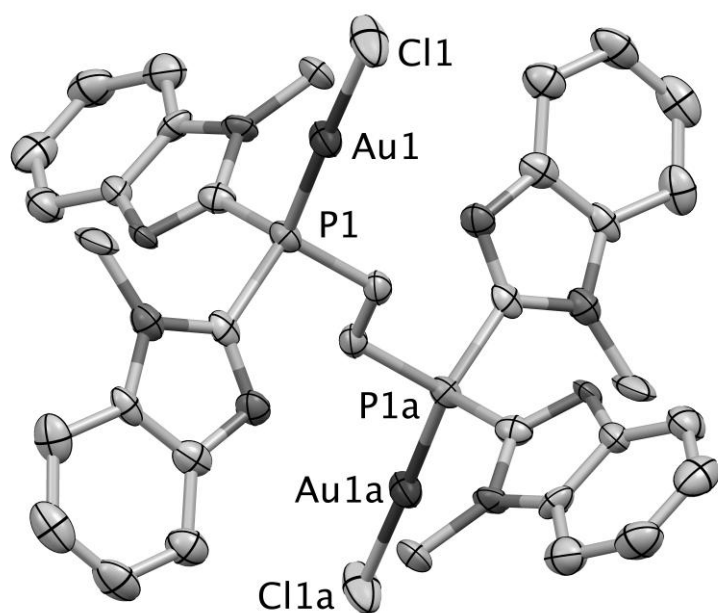

**Figure ESI4.** Molecular structure of [(4)(AuCl)<sub>2</sub>]. Displacement ellipsoids are drawn at the 50 % level and H-atoms are omitted for clarity. Selected bond lengths [Å] and angles [°]: Au1–P1: 2.213(4), Au1–Cl1: 2.277(4), P1–Au1–Cl1: 178.62(13), P1–C1–C1a–P1a: 180.00.

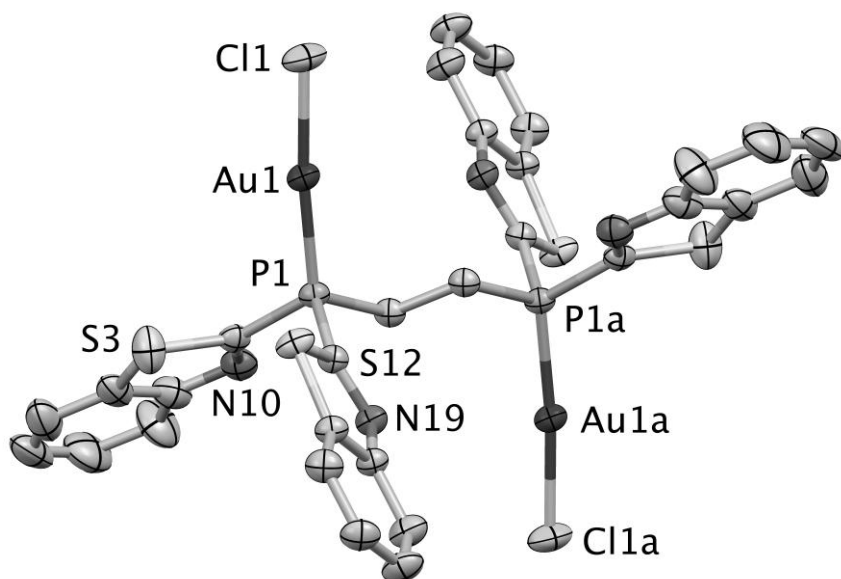

**Figure ESI5.** Molecular structure of [(6)(AuCl)<sub>2</sub>]. Displacement ellipsoids are drawn at the 50 % level and H-atoms are omitted for clarity. Selected bond lengths [Å] and angles [°]: Au1–P1: 2.2143(10), Au1–Cl1: 2.2777(11), P1–Au1–Cl1: 174.05(4), P1–C–C–P1a: 180.00.

**Table ESI1.** X-ray data collection and refinement parameters for compounds [(**1**)(AuCl)<sub>2</sub>], [(**3**)(AuCl)<sub>2</sub>]·0.6EtOH·0.4CH<sub>2</sub>Cl<sub>2</sub>, [(**4**)(AuCl)<sub>2</sub>], [(**6**)(AuCl)<sub>2</sub>] and [(**3**)<sub>2</sub>Au]PF<sub>6</sub>.

|                                                     | [( <b>1</b> )(AuCl) <sub>2</sub> ]                                                            | [( <b>3</b> )(AuCl) <sub>2</sub> ]·0.5EtOH<br>·0.4CH <sub>2</sub> Cl <sub>2</sub>                                    | [( <b>4</b> )(AuCl) <sub>2</sub> ]                                                            | [( <b>6</b> )(AuCl) <sub>2</sub> ]·3(H <sub>2</sub> O)                                                                      | [( <b>3</b> ) <sub>2</sub> Au]PF <sub>6</sub>                                  |
|-----------------------------------------------------|-----------------------------------------------------------------------------------------------|----------------------------------------------------------------------------------------------------------------------|-----------------------------------------------------------------------------------------------|-----------------------------------------------------------------------------------------------------------------------------|--------------------------------------------------------------------------------|
| Empirical formula                                   | C <sub>18</sub> H <sub>24</sub> Au <sub>2</sub> Cl <sub>2</sub> N <sub>8</sub> P <sub>2</sub> | C <sub>23.5</sub> H <sub>28.5</sub> Au <sub>2</sub> Cl <sub>2.8</sub> N <sub>4</sub> O <sub>0.5</sub> P <sub>2</sub> | C <sub>34</sub> H <sub>32</sub> Au <sub>2</sub> Cl <sub>2</sub> N <sub>8</sub> P <sub>2</sub> | C <sub>30</sub> H <sub>26</sub> Au <sub>2</sub> Cl <sub>2</sub> N <sub>4</sub> O <sub>3</sub> P <sub>2</sub> S <sub>4</sub> | C <sub>44</sub> H <sub>48</sub> AuF <sub>6</sub> N <sub>8</sub> P <sub>5</sub> |
| Formula weight                                      | 879.23                                                                                        | 934.71                                                                                                               | 1079.45                                                                                       | 1145.56                                                                                                                     | 1154.72                                                                        |
| Crystal system                                      | Triclinic                                                                                     | Monoclinic                                                                                                           | Triclinic                                                                                     | Triclinic                                                                                                                   | Triclinic                                                                      |
| Space group                                         | P-1                                                                                           | P2 <sub>1</sub>                                                                                                      | P-1                                                                                           | P-1                                                                                                                         | P-1                                                                            |
| a [Å]                                               | 7.7649(2)                                                                                     | 10.94880(13)                                                                                                         | 9.6754(7)                                                                                     | 8.0992(3)                                                                                                                   | 11.5666(2)                                                                     |
| b [Å]                                               | 9.3598(3)                                                                                     | 12.37340(13)                                                                                                         | 11.3757(7)                                                                                    | 9.9494(3)                                                                                                                   | 12.5719(2)                                                                     |
| c [Å]                                               | 9.7306(3)                                                                                     | 11.42410(14)                                                                                                         | 12.1339(7)                                                                                    | 11.4694(4)                                                                                                                  | 16.9038(4)                                                                     |
| α [°]                                               | 106.655(3)                                                                                    | 90                                                                                                                   | 103.894(5)                                                                                    | 94.260(3)                                                                                                                   | 77.1249(18)                                                                    |
| β [°]                                               | 103.914(3)                                                                                    | 97.4074(11)                                                                                                          | 108.377(6)                                                                                    | 93.131(3)                                                                                                                   | 81.4065(17)                                                                    |
| γ [°]                                               | 100.648(3)                                                                                    | 90                                                                                                                   | 108.128(6)                                                                                    | 97.282(3)                                                                                                                   | 80.7994(15)                                                                    |
| Volume [Å <sup>3</sup> ]                            | 632.71(3)                                                                                     | 1534.75(3)                                                                                                           | 1116.59(12)                                                                                   | 912.32(5)                                                                                                                   | 2348.83(8)                                                                     |
| Z                                                   | 1                                                                                             | 2                                                                                                                    | 1                                                                                             | 1                                                                                                                           | 2                                                                              |
| Density (calc.)<br>[Mg/m <sup>3</sup> ]             | 2.308                                                                                         | 2.023                                                                                                                | 1.605                                                                                         | 2.085                                                                                                                       | 1.633                                                                          |
| Absorp. coeff. [mm <sup>-1</sup> ]                  | 11.941                                                                                        | 9.935                                                                                                                | 6.783                                                                                         | 8.532                                                                                                                       | 3.368                                                                          |
| Crystal size [mm <sup>3</sup> ]                     | 0.19 x 0.14 x 0.03                                                                            | 0.64 x 0.09 x 0.02                                                                                                   | 0.15 x 0.07 x 0.02                                                                            | 0.17 x 0.10 x 0.04                                                                                                          | 0.24 x 0.14 x 0.04                                                             |
| Crystal description                                 | colourless plate                                                                              | colourless needle                                                                                                    | colourless plate                                                                              | colourless needle                                                                                                           | colourless plate                                                               |
| Theta range for data<br>collection [°]              | 2.30 to 30.51                                                                                 | 2.76 to 30.51                                                                                                        | 2.20 to 27.10                                                                                 | 2.54 to 33.14                                                                                                               | 2.61 to 30.51                                                                  |
| Reflections collected                               | 7398                                                                                          | 46544                                                                                                                | 10910                                                                                         | 15195                                                                                                                       | 26468                                                                          |
| Independent<br>reflections                          | 3836 [R(int) =<br>0.0277]                                                                     | 9360 [R(int) = 0.0674]                                                                                               | 4930 [R(int) =<br>0.0586]                                                                     | 6962 [R(int) = 0.0279]                                                                                                      | 14316 [R(int) =<br>0.0382]                                                     |
| Reflections observed                                | 3329                                                                                          | 8417                                                                                                                 | 2820                                                                                          | 5537                                                                                                                        | 9762                                                                           |
| Completeness to theta                               | 99.1 % to 30.51°                                                                              | 99.9 % to 30.51°                                                                                                     | 99.9 % to 27.10°                                                                              | 100.0 % to 33.14°                                                                                                           | 99.9 % to 30.51°                                                               |
| Max. and min.<br>Transmission                       | 0.7158 and 0.2646                                                                             | 0.8261 and 0.2292                                                                                                    | 0.8763 and 0.6921                                                                             | 0.7265 and 0.3943                                                                                                           | 0.8771 and 0.7495                                                              |
| Data / restraints /<br>parameters                   | 3836 / 0 / 147                                                                                | 9360 / 4 / 330                                                                                                       | 4930 / 0 / 219                                                                                | 6962 / 0 / 214                                                                                                              | 14316 / 1 / 616                                                                |
| Goodness-of-fit on F <sup>2</sup>                   | 1.052                                                                                         | 1.034                                                                                                                | 0.947                                                                                         | 1.029                                                                                                                       | 0.904                                                                          |
| Final R indices<br>[I>2σ(I)]                        | R1 = 0.0264,<br>wR2 = 0.0693                                                                  | R1 = 0.0324,<br>wR2 = 0.0766                                                                                         | R1 = 0.0509,<br>wR2 = 0.1401                                                                  | R1 = 0.0331,<br>wR2 = 0.0874                                                                                                | R1 = 0.0435, wR2<br>= 0.0743                                                   |
| Largest diff. peak and<br>hole [e.Å <sup>-3</sup> ] | 1.388 and -1.278                                                                              | 1.418 and -0.983                                                                                                     | 1.064 and -0.875                                                                              | 2.173 and -0.800                                                                                                            | 1.848 and -1.169                                                               |

**Table ESI2.** pIC<sub>50</sub> values (mean ± s.d.) of [(L)<sub>2</sub>Au]Cl and [(L)(AuCl)<sub>2</sub>] against human ovarian carcinoma cell lines sensitive (A2780 sens.) or resistant to cisplatin (A2780 cis.) (cisplatin as reference compound, n.a. = not available).

| Ligand    | [(L) <sub>2</sub> Au]X |             | [(L)(AuCl) <sub>2</sub> ] |             |
|-----------|------------------------|-------------|---------------------------|-------------|
|           | A2780 sens.            | A2780 cis.  | A2780 sens.               | A2780 cis.  |
| Cisplatin | 5.88 ± 0.07            | 4.82 ± 0.04 | 5.88 ± 0.07               | 4.82 ± 0.04 |
| <b>1</b>  | 4.54 ± 0.24            | 4.46 ± 0.22 | 4.52 ± 0.28               | 4.48 ± 0.18 |
| <b>2</b>  | 4.67 ± 0.15            | 4.39 ± 0.15 | 4.62 ± 0.18               | 4.42 ± 0.21 |
| <b>3</b>  | 6.40 ± 0.06            | 6.09 ± 0.13 | 6.24 ± 0.03               | 4.73 ± 0.11 |
| <b>4</b>  | n.a                    | n.a         | 5.63 ± 0.06               | 4.93 ± 0.07 |
| <b>5</b>  | 6.35 ± 0.23            | 5.66 ± 0.89 | 5.58 ± 0.51               | 5.17 ± 0.05 |
| <b>6</b>  | n.a                    | n.a         | 5.21 ± 0.22               | <4          |

**Table ESI3.** pIC<sub>50</sub> values (μM, mean ± error) of [(L)<sub>2</sub>Au]<sup>+</sup> against human leukaemia (K562) and rat hepatoma cell lines (H4IIE).

| Compound                                      | K 562       | Hct116      | H4IIE       |
|-----------------------------------------------|-------------|-------------|-------------|
| Cisplatin                                     | 4.74 ± 0.05 | 1.54 ± 0.07 | 1.54 ± 0.02 |
| [( <b>3</b> ) <sub>2</sub> Au]PF <sub>6</sub> | < 4         | 1.33 ± 0.10 | 1.58 ± 0.06 |
| [( <b>5</b> ) <sub>2</sub> Au]Cl              | 6.03 ± 0.05 | 1.04 ± 0.07 | 0.69 ± 0.07 |

**Table ESI4.** Inhibition of thioredoxin reductase (TrxR) and glutathione reductase (GR), mean ± error of the pIC<sub>50</sub>-values of two separate experiments.

| Compound                                      | pIC <sub>50</sub> (TrxR)/μM | pIC <sub>50</sub> (GR)/μM |
|-----------------------------------------------|-----------------------------|---------------------------|
| [( <b>1</b> ) <sub>2</sub> Au]Cl              | 6.86 ± 0.09                 | 6.23 ± 0.06               |
| [( <b>2</b> ) <sub>2</sub> Au]Cl              | 6.94 ± 0.02                 | 5.95 ± 0.05               |
| [( <b>3</b> ) <sub>2</sub> Au]PF <sub>6</sub> | 5.93 ± 0.11                 | 5.37 ± 0.03               |
| [( <b>5</b> ) <sub>2</sub> Au]Cl              | 6.85 ± 0.03                 | 6.34 ± 0.05               |

**Table ES15.** Relative activities of  $[(L)_2Au]Cl$  and  $[(L)(AuCl)_2]$  in relation to cisplatin  
( $IC_{50}$  Cisplatin /  $IC_{50}$  compound).

| Ligand    | $[(L)_2Au]X$ |             | $[(L)(AuCl)_2]$ |             |
|-----------|--------------|-------------|-----------------|-------------|
|           | A2780 sens.  | A2780 cis.  | A2780 sens.     | A2780 cis.  |
| Cisplatin | 1.000        | 1.000       | 1.000           | 1.000       |
| <b>1</b>  | 0.046        | 0.387       | 0.044           | 0.407       |
| <b>2</b>  | 0.061        | 0.325       | 0.055           | 0.354       |
| <b>3</b>  | <b>3.32</b>  | <b>16.5</b> | <b>2.30</b>     | 0.713       |
| <b>4</b>  | n.a          | n.a         | 0.564           | 1.14        |
| <b>5</b>  | <b>2.96</b>  | <b>6.15</b> | 0.502           | <b>1.98</b> |
| <b>6</b>  | n.a          | n.a         | 0.202           | n.a.        |
